# Supplementary material for: The Hippocampal Response to Acute Corticosterone Elevation Is Altered in a Mouse Model for Angelman Syndrome
Source: MDPI journal article supplement (doi:10.3390/ijms24010303), 2022-12-24
Supplement: s1 [file s1]

## Supplementary figures

1

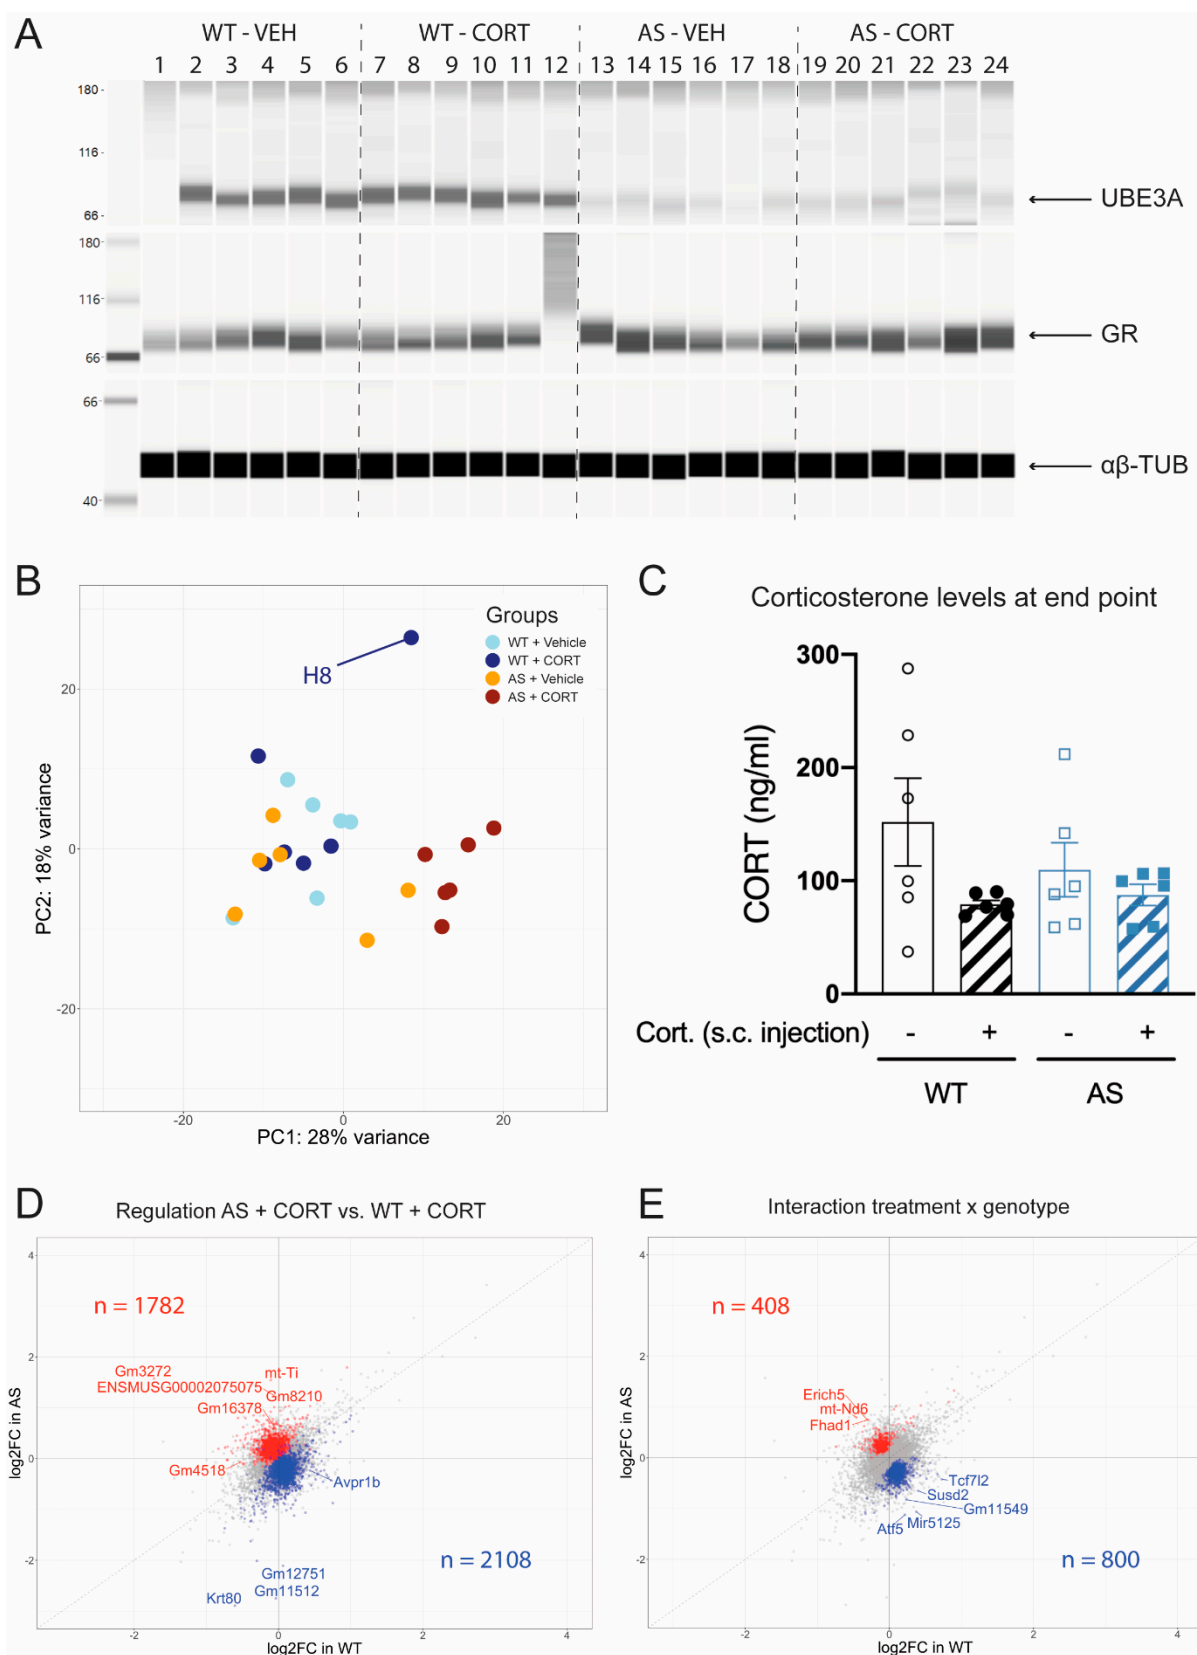

**Figure S1. Consequences of acute corticosterone exposure in the AS mouse brain. (A)** Protein expression of UBE3A, GR and  $\alpha\beta$ -tubulin ( $\alpha\beta$ -TUB) in WT and AS mouse brain after acute treatment

2

3

4

with vehicle or 3mg/kg corticosterone. **(B)** Sample H8 explains 18% of the RNA-seq variance. **(C)** Endpoint corticosterone plasma levels (ng/mL) measured from mouse trunk blood. **(D)** Fold change-fold change plot summarizing the contrast between AS and WT mice treated with acute corticosterone. **(E)** Fold change-fold change plot displaying the genes that significantly contributed to the differential response to acute corticosterone in AS mouse hippocampus.

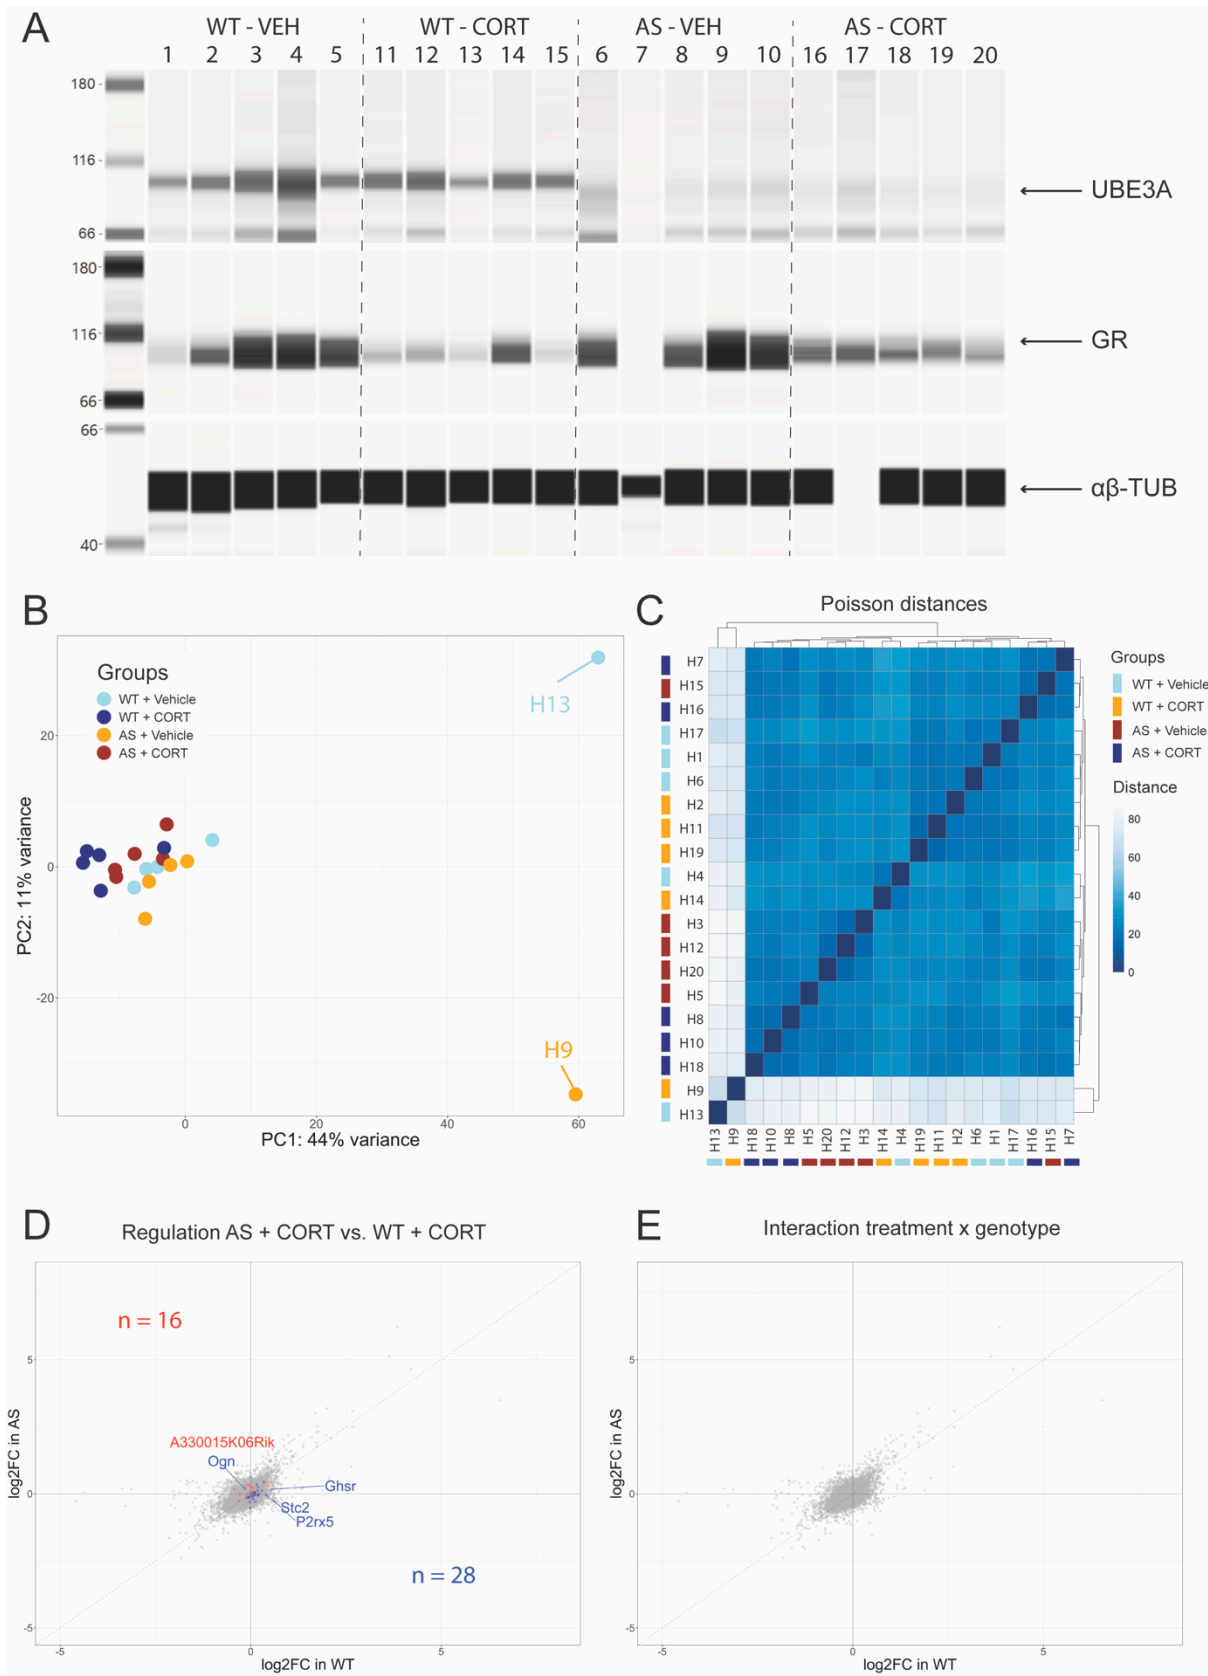

---

**Figure S2. Consequences of continuous corticosterone exposure in the AS mouse brain. (A)** Protein expression of UBE3A, GR and  $\alpha\beta$ -tubulin ( $\alpha\beta$ -TUB) in WT and AS mouse brain after continuous treatment with vehicle or corticosterone (20 mg releasing-pellet). **(B)** Samples H9 and H13 biased the variance analysis. **(C)** Samples H9 and H13 were technical outliers as determined by the Poisson distance analysis. **(D)** Fold change-fold change plot summarizing the contrast between AS and WT mice treated with continuous corticosterone. **(E)** Fold change-fold change plot displaying the genes that significantly contributed to the differential response to continuous corticosterone in AS mouse hippocampus.

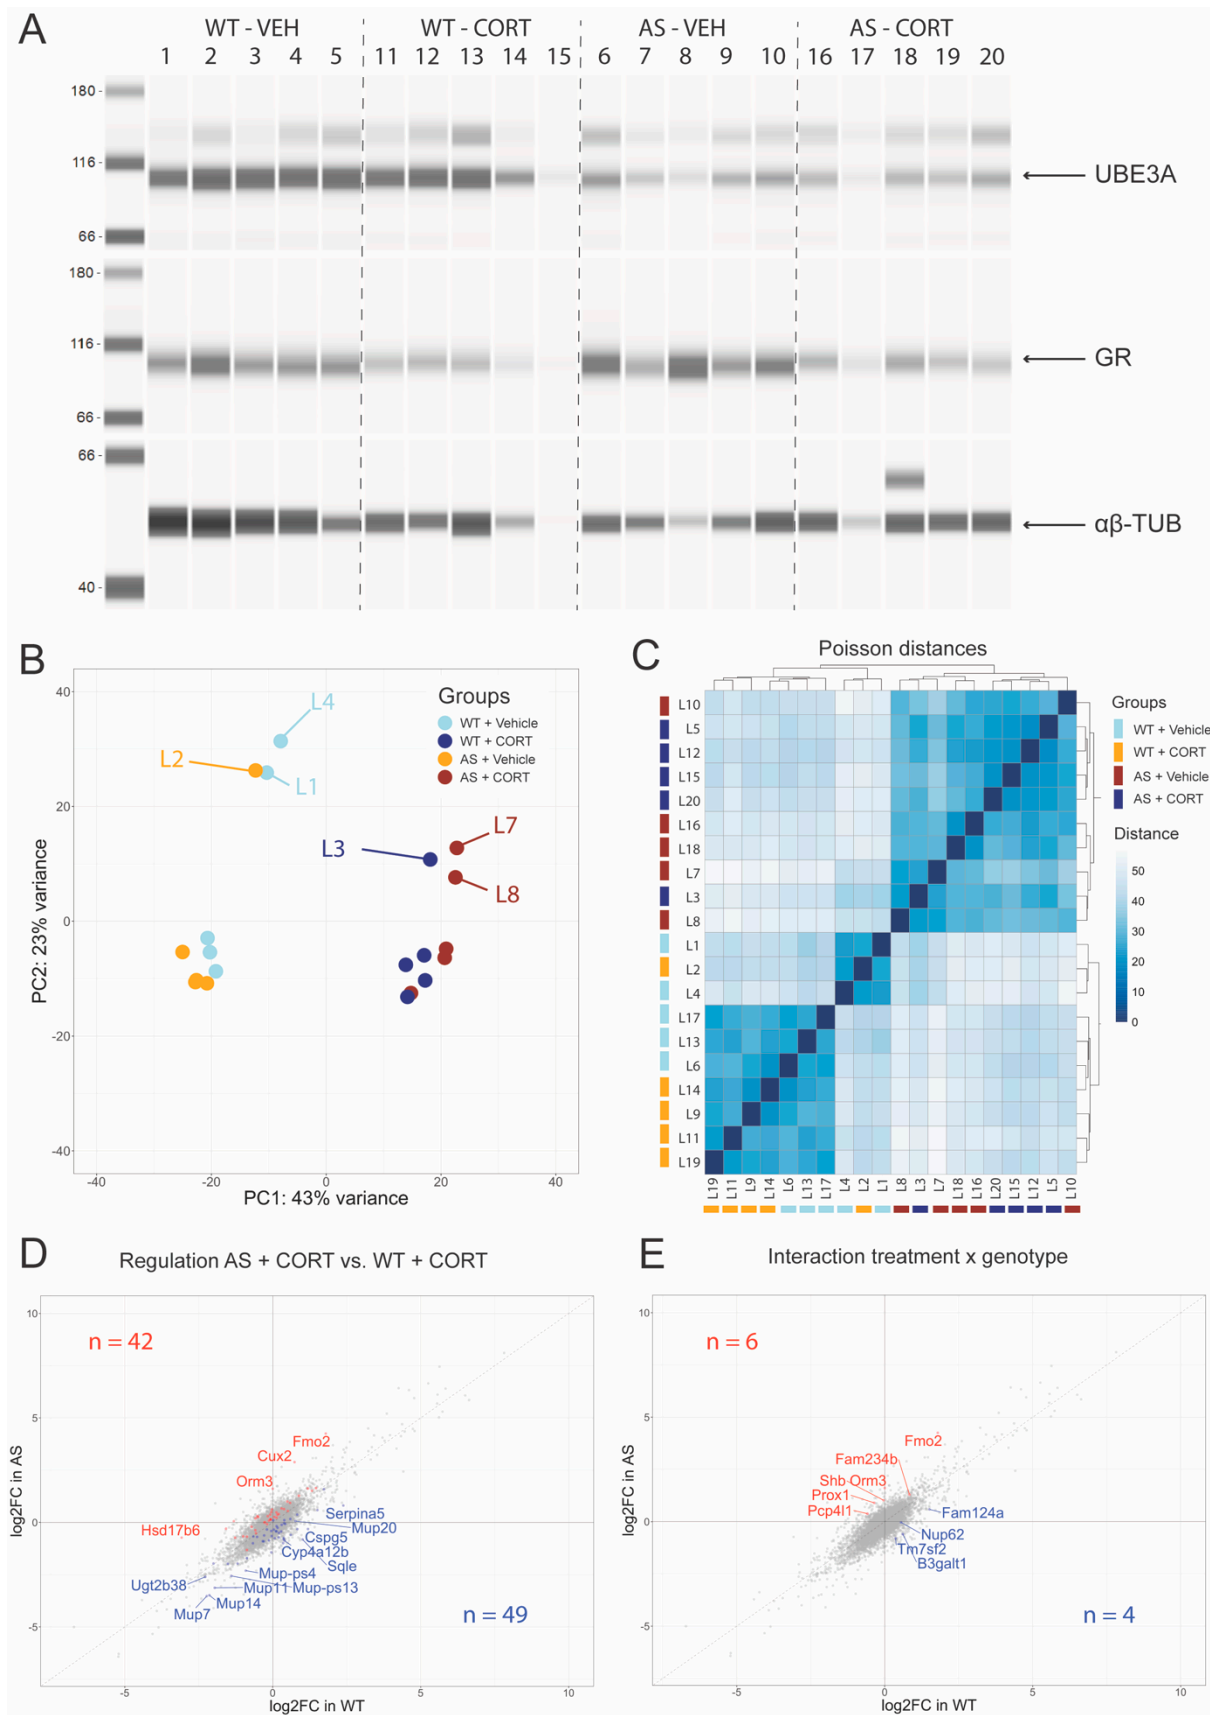

**Figure S3. Consequences of continuous corticosterone exposure in the AS mouse liver. (A)** Protein expression of UBE3A, GR and  $\alpha\beta$ -tubulin ( $\alpha\beta$ -TUB) in WT and AS mouse liver after continuous treatment with vehicle or corticosterone (20 mg releasing-pellet). **(B)** Biological variability between

mice contributed to 23% of the RNA-seq variance. (C) The Poisson distance analysis did not highlight specific outliers. (D) Fold change-fold change plot summarizing the contrast between AS and WT mice treated with continuous corticosterone. (E) Fold change-fold change plot displaying the genes that significantly contributed to the differential response to continuous corticosterone in AS mouse liver.

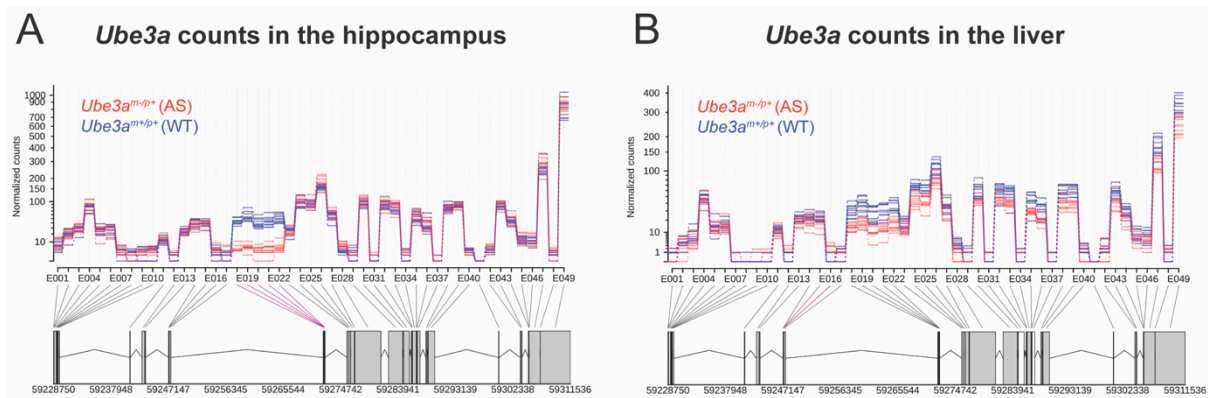

**Figure S4. Differential exon usage analysis of *Ube3a*.** (A) Exon usage plot of *Ube3a* in the AS mouse hippocampus, (B) and liver.

Supplementary tables

Table S1. MARCoNI output.

Table S2. Output of RNA-seq differential gene expression analyses in the mouse hippocampus and liver tissues.

Table S3. Results of gene ontology and pathway enrichment analyses.
